# Supplementary material for: Different Roles for the Axin Interactions with the SAMP versus the Second Twenty Amino Acid Repeat of Adenomatous Polyposis Coli
Source: PLOS journal article supplement (doi:10.1371/journal.pone.0094413), 2014-04-10

Figure S10

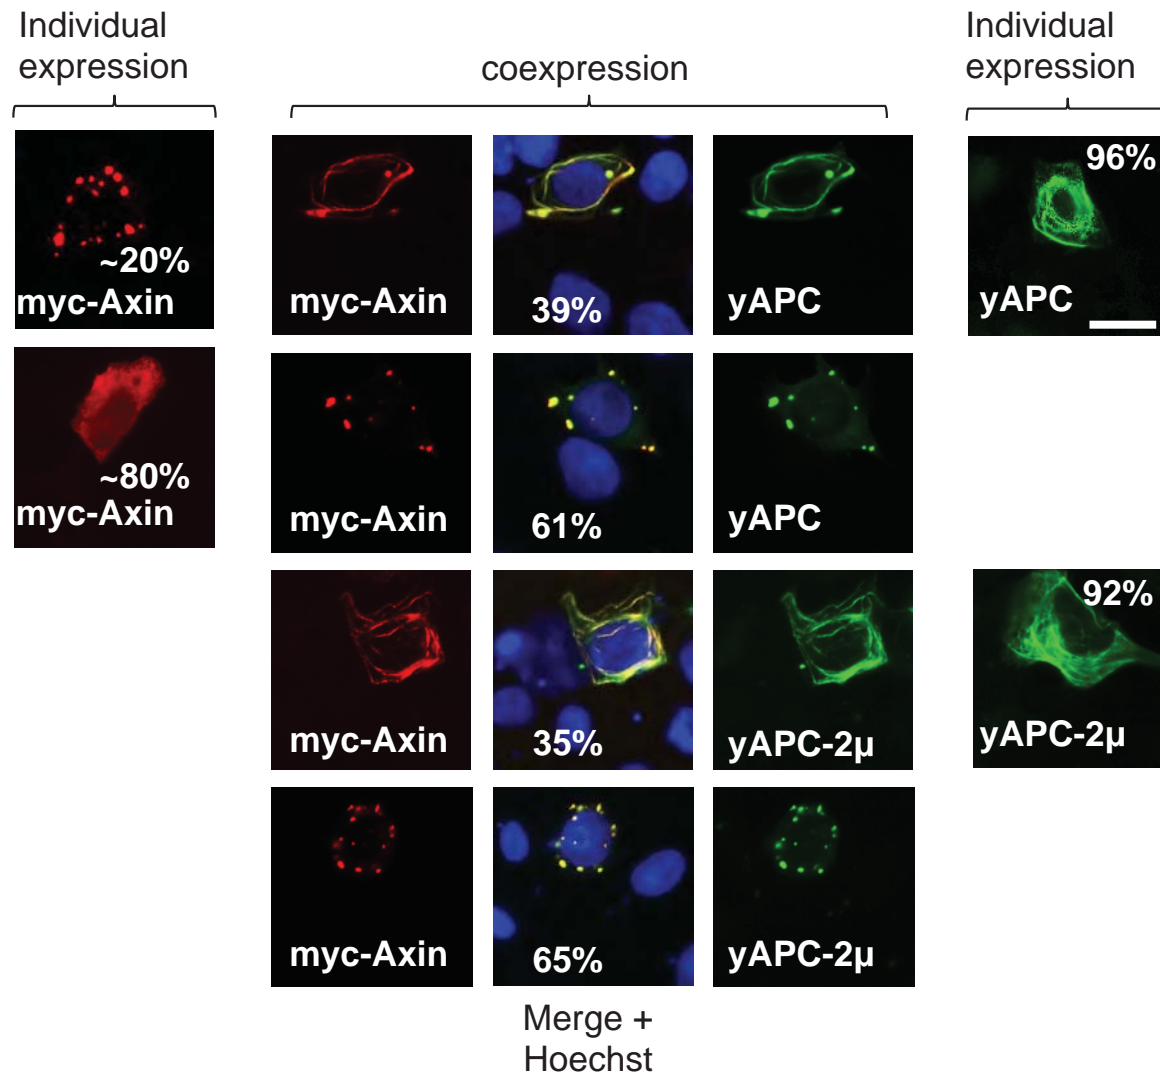

Supplement: S10 (10.1371/journal.pone.0094413.s010) [file journal.pone.0094413.s010]
